# Supplementary material for: The role of adolescent lifestyle habits in biological aging: A prospective twin study
Source: eLife. 2022 Nov 8;11:e80729. doi: 10.7554/eLife.80729 (PMC9642990; doi:10.7554/eLife.80729)
Supplement: Figure 2—figure supplement 1—source data 1. [file elife-80729-fig2-figsupp1-data1.xlsx]

## Sheet: Figure 2_supplement
	Body mass index				Sport index				Daily smoking					Alcohol use
	Mean	SE	95% CI		Mean	SE	95% CI		Threshold	SE	Probability (=1/(1+exp(Threshold)))	95% CI		Mean	SE	95% CI
C1	21.983	0.233	21.526	22.44	3.129	0.069	2.994	3.264	1.303	0.251	0.214	0.142	0.308	6.138	1.069	4.043	8.233
C2	19.448	0.234	18.989	19.907	2.774	0.085	2.607	2.941	2.262	0.39	0.094	0.046	0.183	4.586	1.157	2.318	6.854
C3	24.694	0.339	24.03	25.358	3.147	0.108	2.935	3.359	1.244	0.279	0.224	0.143	0.332	6.812	1.501	3.87	9.754
C4	29.896	0.768	28.391	31.401	2.64	0.098	2.448	2.832	0.521	0.33	0.372	0.237	0.531	7.126	1.472	4.241	10.011
C5	22.534	0.334	21.879	23.189	2.691	0.088	2.519	2.863	-0.907	0.286	0.712	0.586	0.813	15.116	1.838	11.514	18.718
