# Supplementary material for: The role of adolescent lifestyle habits in biological aging: A prospective twin study
Source: eLife. 2022 Nov 8;11:e80729. doi: 10.7554/eLife.80729 (PMC9642990; doi:10.7554/eLife.80729)
Supplement: Figure 2—source data 1. [file elife-80729-fig2-data1.xlsx]

## Sheet: Figure 2
	Body mass index												Regular LTPA												Daily smoking								Regular alcohol use
	At age of 12				At age of 14				At age of 17				At age of 12				At age of 14				At age of 17				At age of 14				At age of 17				At age of 14				At age of 17
	Mean	SE	95% CI		Mean	SE	95% CI		Mean	SE	95% CI		Probability	SE	95% CI		Probability	SE	95% CI		Probability	SE	95% CI		Probability	SE	95% CI		Probability	SE	0.95		Probability	SE	95% CI		Probability	SE	95% CI
C1	16.796	0.546	15.726	17.866	18.589	0.483	17.642	19.536	20.825	0.582	19.684	21.966	0.173	0.018	0.138	0.208	0.783	0.054	0.677	0.889	0.757	0.05	0.659	0.855	0		0	0	0.13	0.027	0.077	0.183	0.012	0.006	0	0.024	0.31	0.035	0.241	0.379
C2	15.203	0.26	14.693	15.713	16.686	0.338	16.024	17.348	18.757	0.319	18.132	19.382	0.091	0.024	0.044	0.138	0.633	0.047	0.541	0.725	0.633	0.046	0.543	0.723	0.002	0.003	-0.004	0.008	0.138	0.022	0.095	0.181	0.015	0.008	-0.001	0.031	0.218	0.041	0.138	0.298
C3	19.135	0.815	17.538	20.732	20.936	0.87	19.231	22.641	22.644	0.556	21.554	23.734	0.139	0.035	0.07	0.208	0.696	0.075	0.549	0.843	0.72	0.062	0.598	0.842	0		0	0	0.167	0.038	0.093	0.241	0.027	0.009	0.009	0.045	0.315	0.04	0.237	0.393
C4	22.729	0.532	21.686	23.772	24.752	0.757	23.268	26.236	27.076	1.072	24.975	29.177	0.097	0.019	0.06	0.134	0.594	0.052	0.492	0.696	0.547	0.062	0.425	0.669	0.036	0.017	0.003	0.069	0.341	0.049	0.245	0.437	0.057	0.019	0.02	0.094	0.364	0.048	0.27	0.458
C5	17.191	0.148	16.901	17.481	18.864	0.154	18.562	19.166	20.591	0.162	20.273	20.909	0.108	0.015	0.079	0.137	0.537	0.041	0.457	0.617	0.466	0.038	0.392	0.54	0.25	0.029	0.193	0.307	0.741	0.025	0.692	0.79	0.31	0.037	0.237	0.383	0.73	0.045	0.642	0.818
