# Supplementary material for: The role of adolescent lifestyle habits in biological aging: A prospective twin study
Source: eLife. 2022 Nov 8;11:e80729. doi: 10.7554/eLife.80729 (PMC9642990; doi:10.7554/eLife.80729)
Supplement: Figure 3—figure supplement 1—source data 1. [file elife-80729-fig3-figsupp1-data1.xlsx]

## Sheet: Figure 3 supplement
	DNAm ADM				DNAm B2M				DNAm GDF15				DNAm cystatinC				DNAm leptin				DNAm PAI-1				DNAm TIMP-1				DNAm packyrs
	Mean	SE	95% CI		Mean	SE	95% CI		Mean	SE	95% CI		Mean	SE	95% CI		Mean	SE	95% CI		Mean	SE	95% CI		Mean	SE	95% CI		Mean	SE	95% CI
C1	0.599	0.062	0.477	0.721	0.318	0.1	0.122	0.514	0.181	0.097	-0.009	0.371	0.1	0.096	-0.088	0.288	0.797	0.034	0.73	0.864	-0.25	0.089	-0.424	-0.076	-0.045	0.082	-0.206	0.116	-0.39	0.09	-0.566	-0.214
C2	0.63	0.072	0.489	0.771	-0.053	0.122	-0.292	0.186	0.109	0.123	-0.132	0.35	0.021	0.096	-0.167	0.209	0.712	0.046	0.622	0.802	-0.389	0.126	-0.636	-0.142	-0.1	0.158	-0.41	0.21	-0.348	0.077	-0.499	-0.197
C3	0.793	0.08	0.636	0.95	0.372	0.134	0.109	0.635	0.388	0.106	0.18	0.596	0.314	0.153	0.014	0.614	0.748	0.062	0.626	0.87	-0.184	0.111	-0.402	0.034	0.109	0.117	-0.12	0.338	-0.194	0.101	-0.392	0.004
C4	0.837	0.072	0.696	0.978	0.321	0.128	0.07	0.572	0.371	0.137	0.102	0.64	0.138	0.119	-0.095	0.371	0.893	0.064	0.768	1.018	0.12	0.132	-0.139	0.379	0.374	0.154	0.072	0.676	-0.021	0.167	-0.348	0.306
C5	0.594	0.063	0.471	0.717	0.033	0.102	-0.167	0.233	0.186	0.092	0.006	0.366	-0.088	0.093	-0.27	0.094	0.808	0.053	0.704	0.912	-0.227	0.11	-0.443	-0.011	0.004	0.098	-0.188	0.196	0.374	0.135	0.109	0.639
