# Supplementary material for: The role of adolescent lifestyle habits in biological aging: A prospective twin study
Source: eLife. 2022 Nov 8;11:e80729. doi: 10.7554/eLife.80729 (PMC9642990; doi:10.7554/eLife.80729)
Supplement: Figure 3—source data 1. [file elife-80729-fig3-data1.xlsx]

## Sheet: Figure 3
	AA PhenoAge				AA GrimAge				DunedinPoAm				DunedinPACE
	Mean	SE	95% CI		Mean	SE	95% CI		Mean	SE	95% CI		Mean	SE	95% CI
C1	0.31	0.512	-0.694	1.314	-1.23	0.287	-1.793	-0.667	1.001	0.007	0.989	1.017	0.891	0.009	0.873	0.909
C2	-0.235	0.633	-1.476	1.006	-1.802	0.302	-2.394	-1.21	0.987	0.008	0.971	1.003	0.865	0.01	0.845	0.885
C3	1.355	0.649	0.083	2.627	-0.259	0.421	-1.084	0.566	1.001	0.009	0.983	1.019	0.907	0.011	0.885	0.929
C4	2.282	0.614	1.079	3.485	0.594	0.493	-0.372	1.56	1.053	0.01	1.033	1.073	0.964	0.016	0.933	0.995
C5	-0.049	0.544	-1.115	1.017	1.47	0.387	0.711	2.229	1.045	0.009	1.027	1.063	0.924	0.012	0.9	0.948
