# Supplementary material for: The role of adolescent lifestyle habits in biological aging: A prospective twin study
Source: eLife. 2022 Nov 8;11:e80729. doi: 10.7554/eLife.80729 (PMC9642990; doi:10.7554/eLife.80729)
Supplement: Figure 4—source data 1. [file elife-80729-fig4-data1.xlsx]

## Sheet: Figure 4
	AA PhenoAge				AA GrimAge				DunedinPoAm				DunedinPACE
	Estimate	SE	95% CI		Estimate	SE	95% CI		Estimate	SE	95% CI		Estimate	SE	95% CI
a2Tot	0.649	0.071	0.51	0.788	0.752	0.083	0.589	0.915	0.606	0.066	0.477	0.735	0.67	0.077	0.519	0.821
e2Tot	0.355	0.043	0.271	0.439	0.28	0.034	0.213	0.347	0.374	0.042	0.292	0.456	0.322	0.039	0.246	0.398
VarTot	1.004	0.058	0.89	1.118	1.032	0.083	0.869	1.195	0.981	0.062	0.859	1.103	0.992	0.079	0.837	1.147
a2Res	0.612	0.068	0.479	0.745	0.617	0.07	0.48	0.754	0.482	0.058	0.368	0.596	0.562	0.065	0.435	0.689
e2Res	0.355	0.043	0.271	0.439	0.242	0.03	0.183	0.301	0.347	0.037	0.274	0.42	0.326	0.039	0.25	0.402
VarRes	0.967	0.055	0.859	1.075	0.859	0.068	0.726	0.992	0.829	0.053	0.725	0.933	0.887	0.068	0.754	1.02
(a2Tot - a2Res )/VarTot	0.037				0.131				0.126				0.109
(e2Tot - e2Res )/VarTot	0				0.037				0.028				-0.004
R2	0.037				0.168				0.154				0.105
